# Supplementary material for: A feedback loop comprising PRMT7 and miR-24-2 interplays with Oct4, Nanog, Klf4 and c-Myc to regulate stemness
Source: PubMed Central journal article supplement — Nucleic Acids Res. 2016 Sep 12;44(22):10603–18. doi: 10.1093/nar/gkw788 (PMC5159542; doi:10.1093/nar/gkw788), 2016-09-12
Supplement: supp_gkw788_nar-00780-y-2016-File003.pdf [file supp_gkw788_nar-00780-y-2016-File003.pdf]

# Supplementary Figure S1

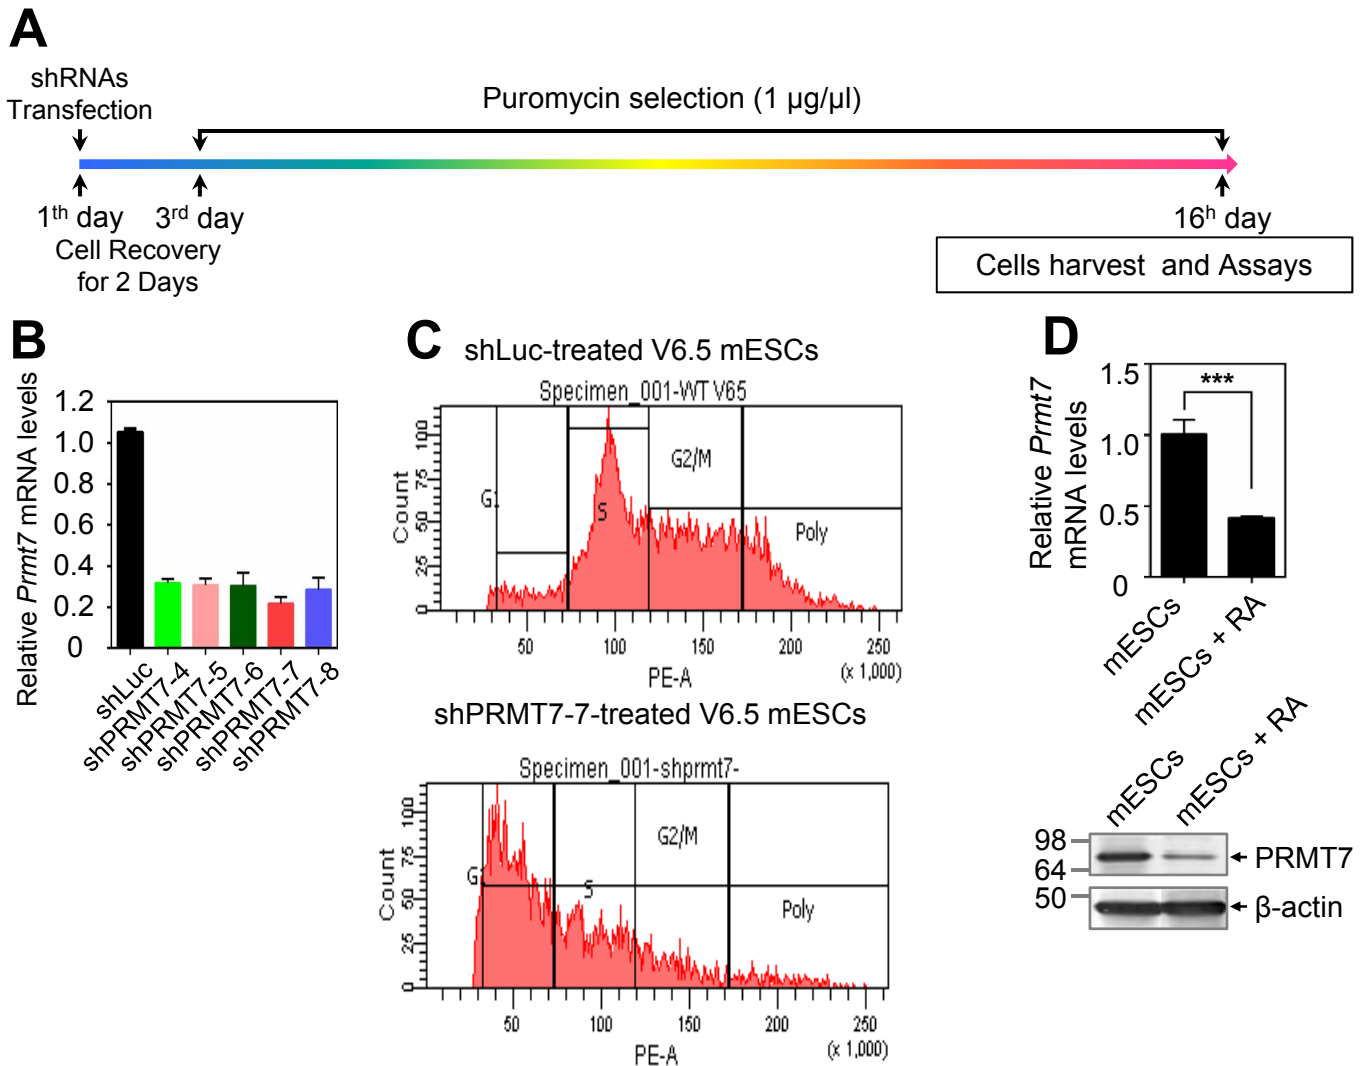

## Supplementary Figure S1.

- (A) The outline for shRNA treatment and subsequent puromycin selection of V6.5 mESCs.
- (B) Analysis of *Prmt7* mRNA levels in shLuciferase (shLuc)-treated and shPRMT7-depleted V6.5 mESCs using quantitative RT-PCR.
- (C) PRMT7 knockdown increases cell population in G1 phase while reducing cell percentages in S and G2/M phases. Cells were electroporated with different shRNAs containing a puromycin-resistant gene, recovered for 2 days, and subjected to puromycin selection for another 10-14 days. Cell cycle analysis indicates spontaneous mESC differentiation. The distribution of shLuc- or shPRMT7-treated V6.5 mESCs in G1, S, and G2/M phase of the cell cycle are shown. Cells were harvested, fixed in cold 75% ethanol for 30 min at 4°C, and washed 2 times with PBS. Then, cells were treated with a buffer containing 50 µg/ml propidium iodide, 5 mM MgCl<sub>2</sub>, 10 mM TRIS-HCl pH 7.0, 25 µg/ml RNaseA at 37°C for 30 min. DNA contents were examined using flow cytometry.
- (D) Quantitative RT-PCR and Western analyses showed that PRMT7 mRNA and protein levels were decreased in differentiated V6.5 mESCs that were generated by RA treatment of embryoid body (EB).

## Supplementary Figure S2

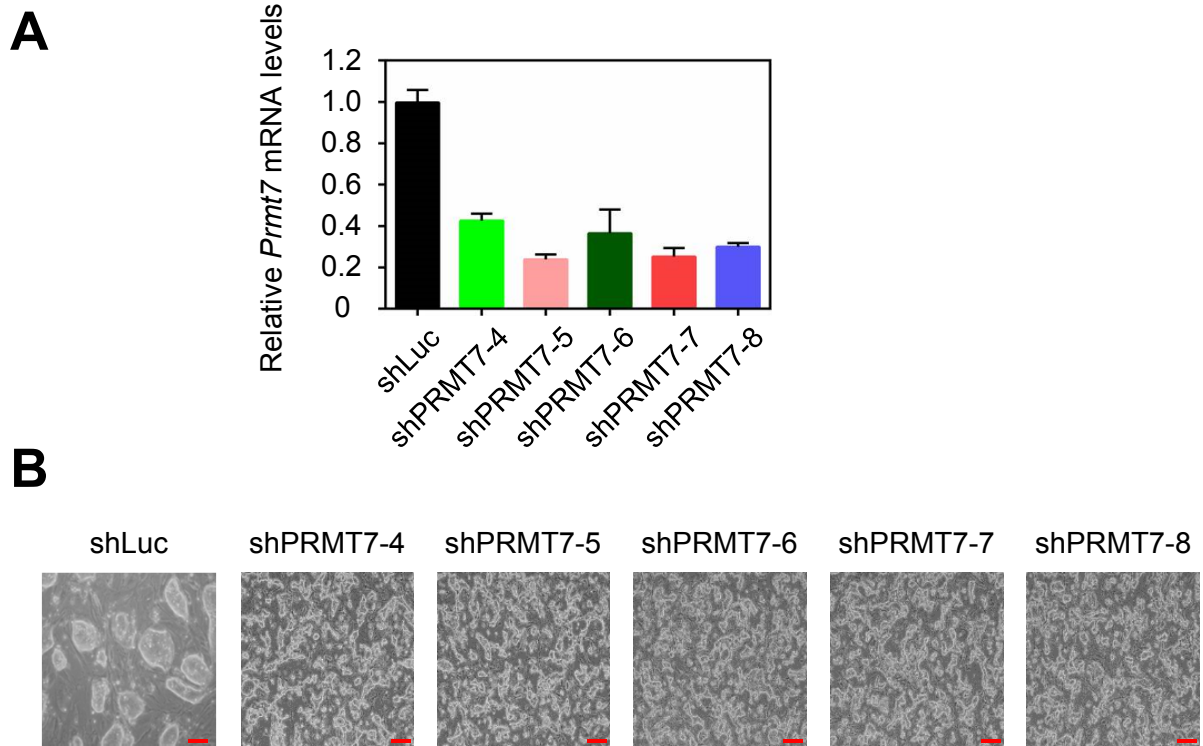

**Supplementary Figure S2. PRMT7 depletion results in spontaneous differentiation of R1 mESCs.**

(A) Quantitative RT-PCR analysis of *Prmt7* mRNA levels in shLuc- and shPRMT7 (shPRMT7-4 to -8)-treated R1 mESCs.

(B) Microscopic images demonstrated that shPRMT7-treated R1 mESCs were differentiated. Red scale bar, 100  $\mu$ m.

# Supplementary Figure S3

## A V6.5 mESCs

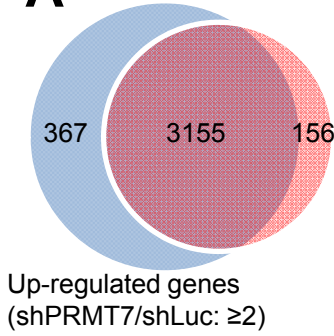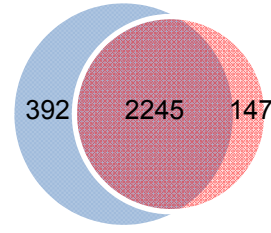

shPRMT7-7  
shPRMT7-8

## B V6.5 mESCs

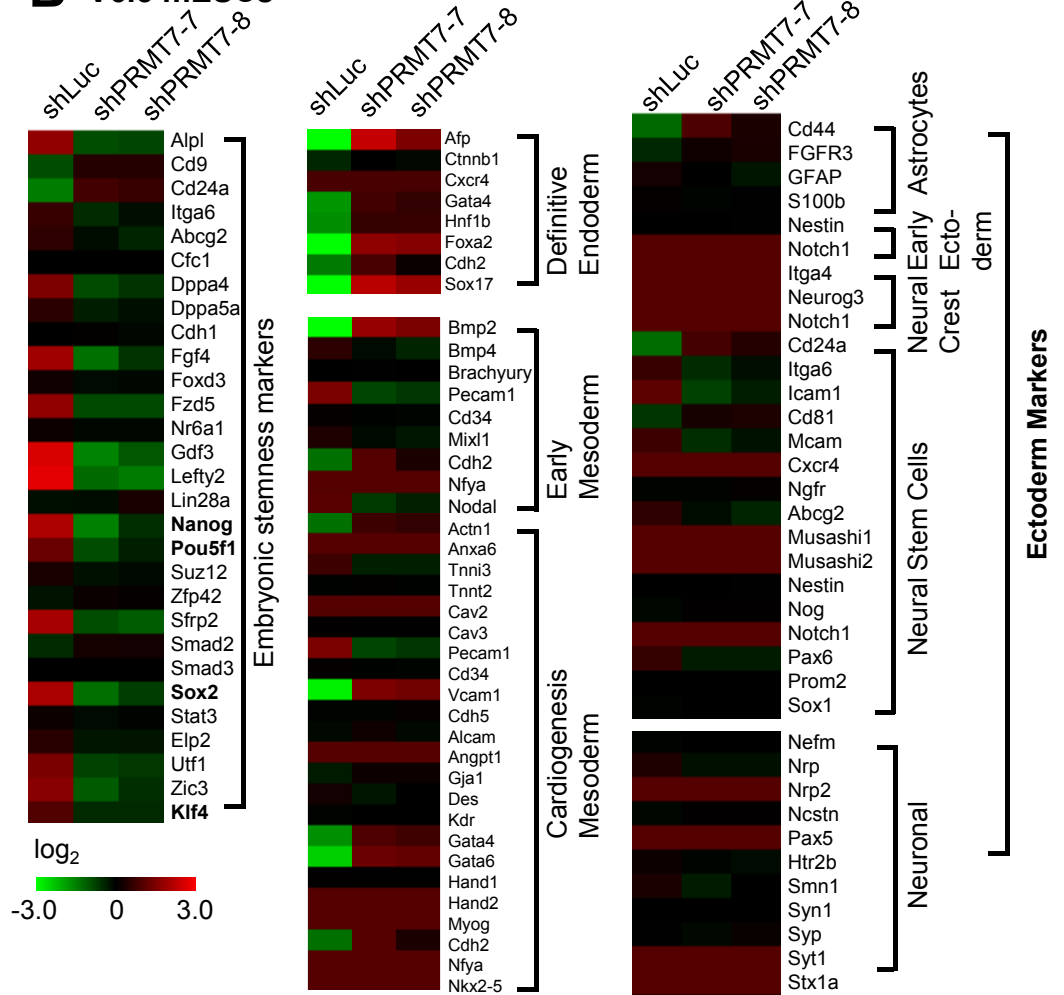

## C V6.5 mESCs

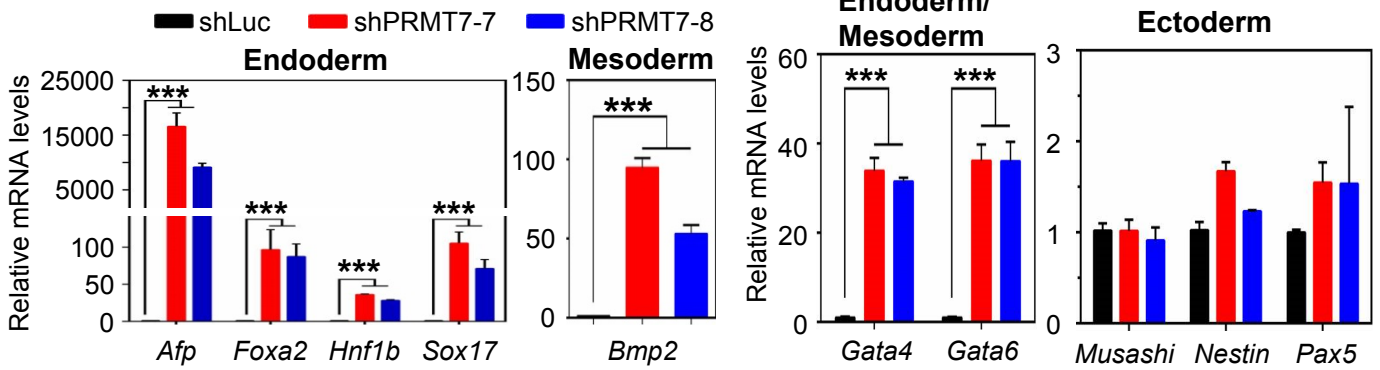

## D R1 mESCs

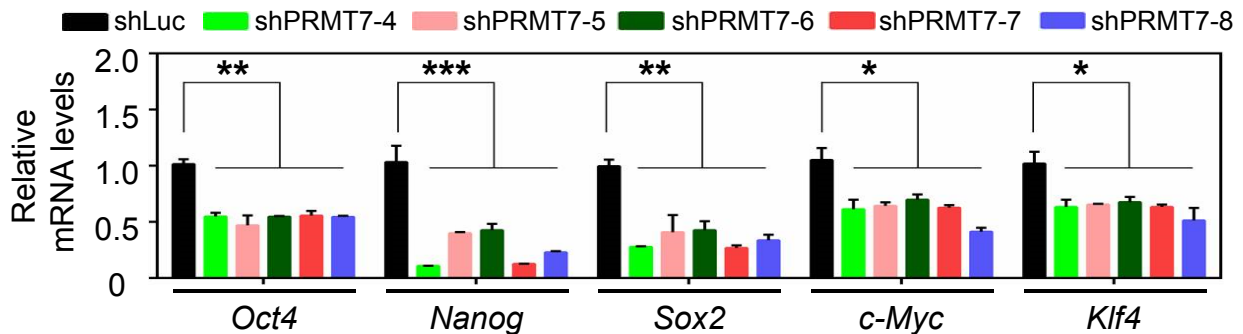

**Supplementary Figure S3. PRMT7 knockdown downregulated several pluripotent genes and upregulated multiple mesoderm- and endoderm-specific genes.**

- (A) Venn diagrams of genes that are upregulated or downregulated at least 2 fold by shPRMT7s (shPRMT7-7 or shPRMT7-8) in V6.5 mESCs. Genes (3155/3522 = 89.6%) upregulated by shPRMT7-7 highly overlap those (3155/3311 = 95.3%) upregulated by shPRMT7-8. Similarly, genes (2245/2637 = 85.1%) downregulated by shPRMT7-7 highly overlap those (2245/2392 = 93.9%) downregulated by shPRMT7-8.
- (B) Heat maps of stemness, endoderm, mesoderm, and ectoderm marker genes that are compared between shLuc-treated and PRMT7-depleted V6.5 mESCs.
- (C) Comparison of mRNA levels of several endoderm-, mesoderm- or ectoderm-associated genes between shLuc-treated and PRMT7-depleted V6.5 mESCs using quantitative RT-PCR analysis.
- (D) Quantitative RT-PCR analysis showed that *Oct4*, *Nanog*, *Sox2*, *c-Myc*, and *Klf4* mRNA levels were decreased in shPRMT7-treated R1 mESCs compared to those in shLuc-treated cells.

# Supplementary Figure S4

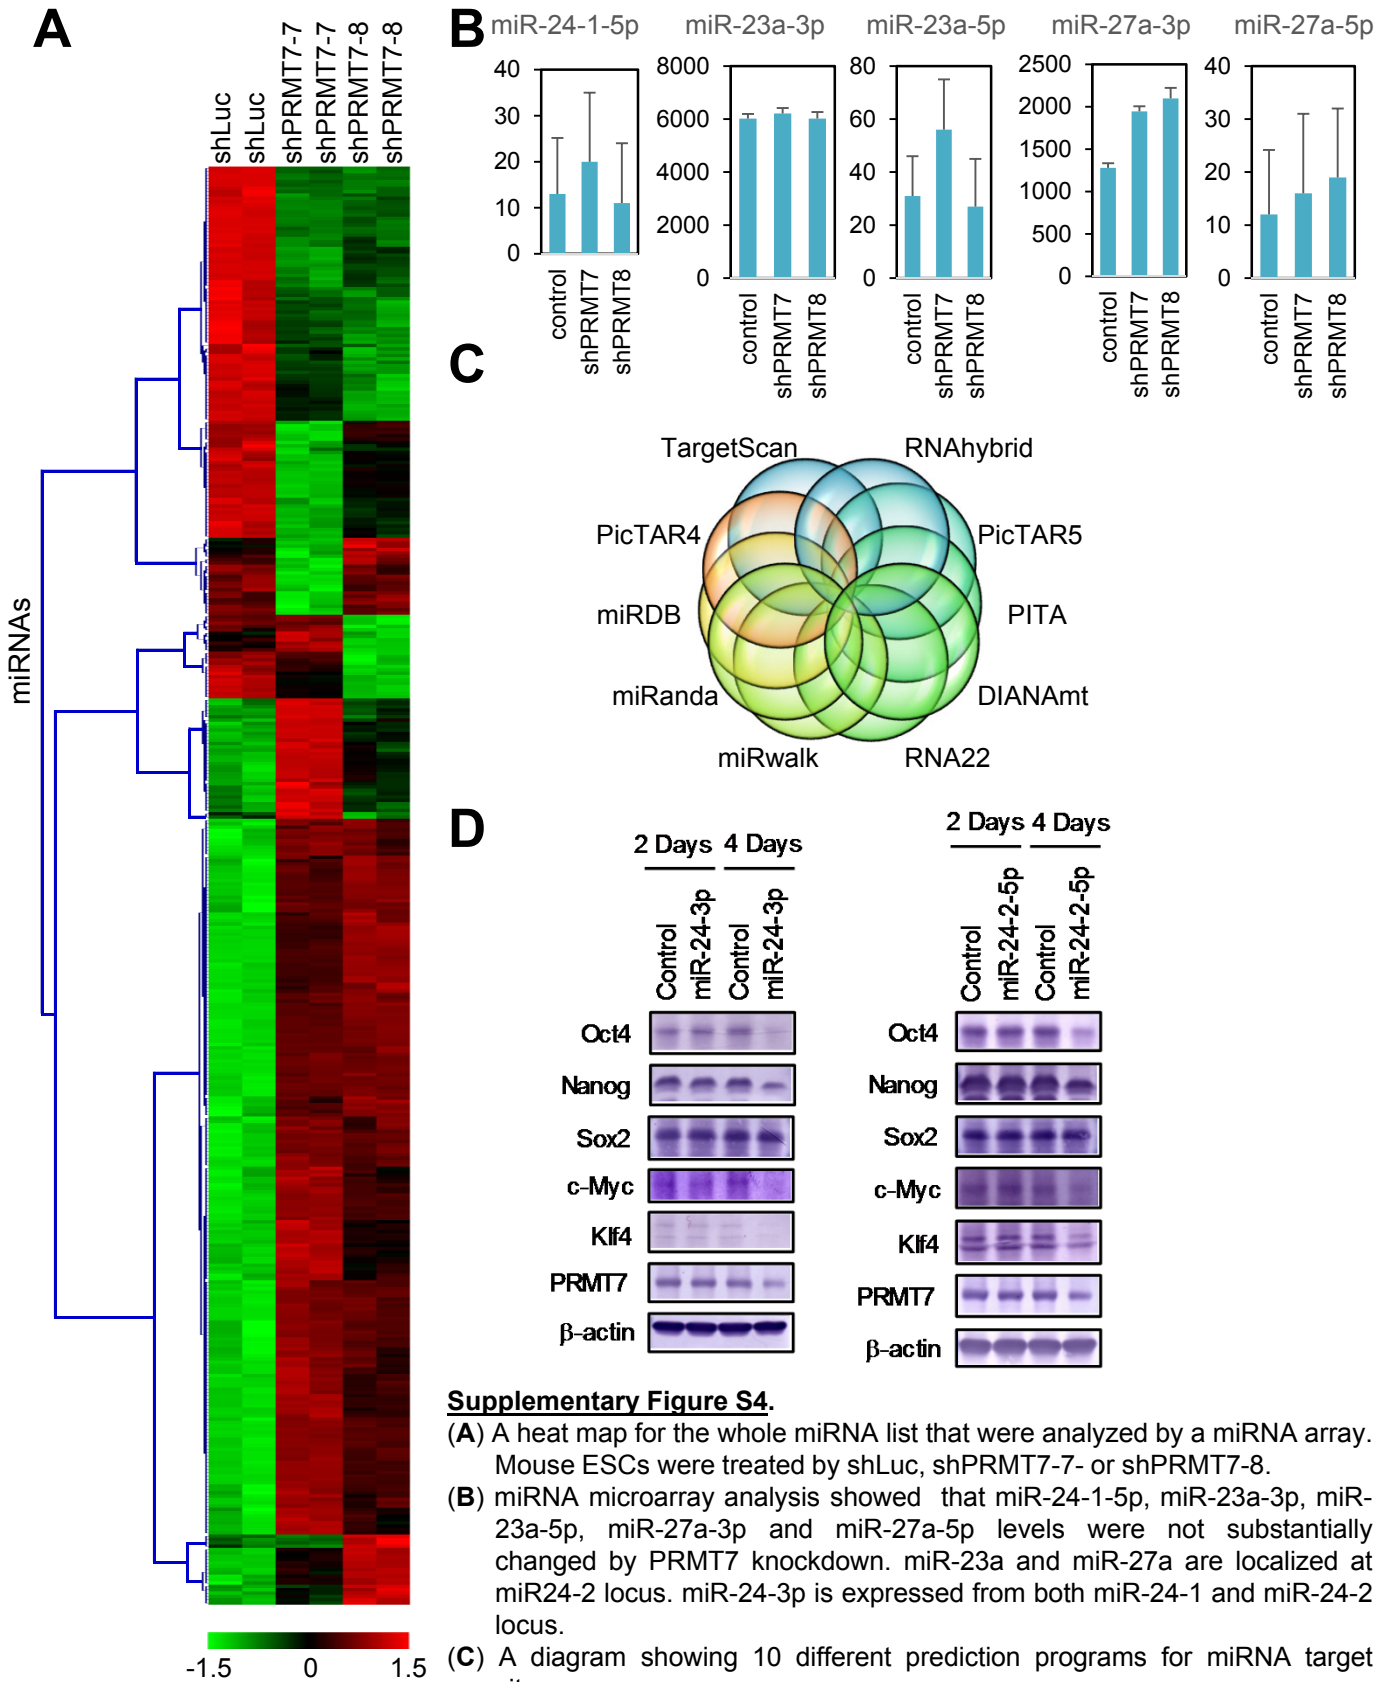

## Supplementary Figure S4.

- (A) A heat map for the whole miRNA list that were analyzed by a miRNA array. Mouse ESCs were treated by shLuc, shPRMT7-7- or shPRMT7-8.
- (B) miRNA microarray analysis showed that miR-24-1-5p, miR-23a-3p, miR-23a-5p, miR-27a-3p and miR-27a-5p levels were not substantially changed by PRMT7 knockdown. miR-23a and miR-27a are localized at miR24-2 locus. miR-24-3p is expressed from both miR-24-1 and miR-24-2 locus.
- (C) A diagram showing 10 different prediction programs for miRNA target sites.
- (D) Western blot analysis showed that protein levels of Oct4, Nanog, Sox2, c-Myc, and Klf4 were reduced in V6.5 mESCs treated with miR-24-3p and miR-24-2-5p mimics (Related to **Figure 4C–F**).

# Supplementary Figure S5

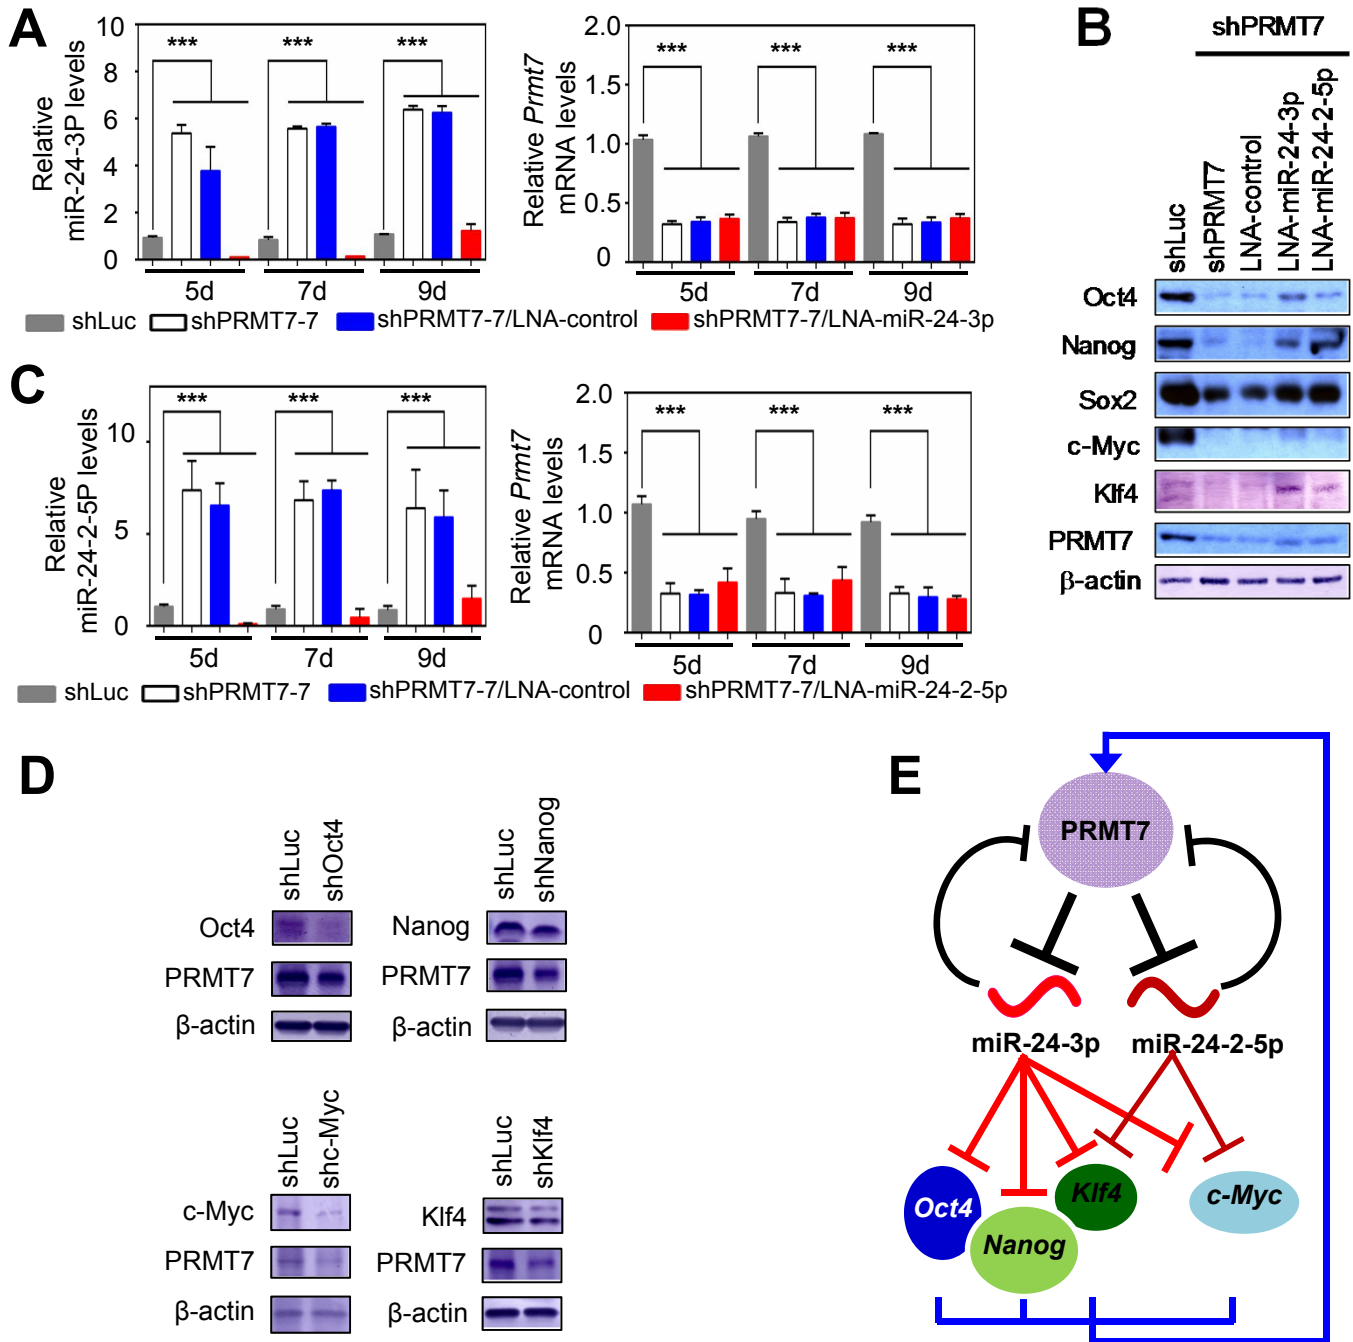

## Supplementary Figure S5.

(A and C) miR-24-3p (A) and miR-24-2-5p (B) levels were increased in shPRMT7-treated V6.5 mESCs as compared to shLuc-treated mESCs (**left panels**). LNA-miR-24-3p (or LNA-miR-24-2-5p) treatment in shPRMT7-treated V6.5 mESCs at the 5<sup>th</sup>, 7<sup>th</sup>, or 9<sup>th</sup> day after shPRMT7 transfection decreased miR-24-3p (or miR-24-2-5p) levels as compared to LNA-control treatment (**left panels**). However, PRMT7 mRNA levels in shPRMT7-treated V6.5 mESCs were not changed by the treatment of LNA-miR-24-3p or LNA-miR-24-2-5p (**right panels**) (Related to Figure 5).

(B) The treatment of LNA-miR-24-3p and LNA-miR-24-2-5p at the 7<sup>th</sup> day after shPRMT7-7 transfection restored at least in part Oct4, Nanog, Sox2, c-Myc and Klf4 protein levels in PRMT7-depleted V6.5 mESCs (Related to Figure 5).

(D) Knockdown of Oct4, Nanog, Sox2, c-Myc and Klf4 decreased PRMT7 protein levels in V6.5 mESCs (Related to Figure 7).

(E) **A proposed model.** The feedback regulatory loop consisting of PRMT7 and miR-24-3p/miR-24-2-5p is interactive with the core pluripotency factors Oct4, Nanog, Klf4 and c-Myc to regulate mESC pluripotency.

# Supplementary Table S1

**Supplementary Table S1.** Oligonucleotide sequences.

|                       |                                                                 | 5'-3' Forward Sequence                                         | 5'-3' Reverse Sequence                                         |
|-----------------------|-----------------------------------------------------------------|----------------------------------------------------------------|----------------------------------------------------------------|
|                       | h.PRMT7                                                         | CCCGAATTCGCCACCATGAAGATCTTCTGCAGTCG                            | CCCGCGCCCGCTCTGGGGTATCTGCATGCCTGAA                             |
|                       | m.PRMT7                                                         | CCCGAATTCGCCACCATGAAGTCTTCTGTGGCCG                             | CCCGCGCCCGCTTCTCAATAAGAGATCAGCT                                |
|                       | PRMT7(E144A)                                                    | CAACATCCTGGTCACAGcGTTGTTTGACACAGAGC                            | GCTCTGTGTCAAACAACgCTGTGACCAGGATGTTG                            |
|                       | PRMT7(E153A)                                                    | GCTGATCGGGcGGGGGCGCTGC                                         | GCAGCGCCCCgCCCCGATCAGC                                         |
|                       | PRMT7 (E144/153A)                                               | CAACATCCTGGTCACAGcGTTGTTTGACACAGAGCTGATC                       | GCAGCGCCCCgCCCCGATCAGCTCTGTGTCAAACAACgCTGTGA                   |
|                       | PRMT7 (E144/153A)                                               | GGGcGGGGGCGCTGC                                                | CCAGGATGTTG                                                    |
| Cloning & Mutation    | PRMT7(E478A)                                                    | CTCCTCCTGGGGcGCCCCGTTCTTCACT                                   | AGTGAAGAAGCGGcGCCCCAGGAGGAG                                    |
|                       | PRMT7(H644A)                                                    | CTGCTGCTGGAACCCcGCTGCAAGCAGGCCGTC                              | GACGGCCTGCTTGCAGcGGGGTTCAGCAGCAG                               |
|                       | L-Oct4                                                          | AAAAGCTAGTGGCACCAGCCCTCCCTGGGGATGCT                            | AAAAAGCTTGCCAGGACTACACAGAAGCTCATCTT                            |
|                       | L-m.Oct4 (Mut-01)                                               | CCCTCCCTGGGGATGCTGaaaaacaAGGCAAGGGAGGTAGA                      | TCTACCTCCCTGCTtggtttttCAGCATCCCCAGGGAGGG                       |
|                       | L-m.Oct4 (Mut-02)                                               | CATGGGATCCCATTACAGATGGTTGaaaaaaaaCCATGTGGTTGCT                 | AGTTCAATTCCCAGCAACCACATGGtttttttCAACCATCTGTAA                  |
|                       | L-m.Oct4 (Mut-03)                                               | AAGAGCAGTCAGTCTTAAACCGCaaaaaaaaTCTCTCCAGCCCT                   | AAAAAGAGTTTGAGGGCTGGAGAGAtttttttGCGGTTAAGAGCA                  |
|                       | L-m.Oct4-5p (Mut-01)                                            | CAAACTCTTTTT                                                   | CTGACTGCTCTT                                                   |
|                       | L-m.Oct4-5p (Mut-01)                                            | gccctccctggggatgctgtgagcca <del>taaat</del> aggaggtagacaa      | ttgtctacctccct <del>at</del> ttatggctcacagcatccccaggaggggc     |
|                       | L-m.Oct4-5p (Mut-02)                                            | tggggttggagcccaacctatagaga <del>ataaat</del> ttgcatattcgccatc  | cgctctaggatggcgaatagca <del>at</del> ttatctctataggttgggct      |
|                       | L-Nanog                                                         | ctagaggcg                                                      | ccaaccca                                                       |
|                       | L-Nanog                                                         | AAAAGCTAGTGACTTACGCAACATCTGGGCTTAAA                            | AAAAAGCTTAAACCTGTCTTGATAAACAATAAAG                             |
|                       | L-m.Nanog (Mut-01)                                              | GCGTCAGATCTTGTACGTATGGTTGaaaaaaaaCCATGTGGTTGC                  | AGTTCAAATCCCAGCAACCACATGGtttttttCAACCATACGTAA                  |
|                       | L-m.Nanog (Mut-02)                                              | TGGGATTTGAACT                                                  | CAAGATCTGACGC                                                  |
|                       | L-m.Nanog (Mut-02)                                              | CTTCGGGAAGAGCAGTCGGGTGCTCTTATCCaaaaaaaaTCTCAC                  | TTAAAAAATAAACCAGGGGCTGGTGAGAttttttttGGATAAG                    |
|                       | L-m.Nanog-5p                                                    | CAGCCCTGGTTTATTTTTTAAA                                         | AGCACCCGACTGCTCTCCGAAG                                         |
|                       | L-m.Nanog-5p                                                    | caaacctaggacttagaacatgca <del>gaaata</del> caactcaactcttgagct  | agagctcagaagttgagttg <del>ta</del> tttctgcatgttctaagtcctaggtt  |
|                       | L-Sox2                                                          | ct                                                             | tg                                                             |
|                       | L-Sox2 (Mut-01)                                                 | AAAAGCTAGTTGGACACTGAAATTATGCCTGA                               | AAAAAGCTTACGTCCGCAGCCCTCTTACT                                  |
|                       | L-m.Sox2 (Mut-01)                                               | Cttggggaactggataactgt <del>actaaat</del> ccaagatcttgatgttacc   | gctggtaacatcaagatcttgg <del>at</del> ttagttacagttatccagttcccca |
|                       | L-m.Sox2 (Mut-02)                                               | gc                                                             | ag                                                             |
| L-m.Sox2 (Mut-02)     | tgtagctggtacacgcaaaagaga <del>taaat</del> ggcaacagacatattacag   | ctctgtaatatgtctgttgc <del>at</del> ttatctcttttgcgtgtaccagct    |                                                                |
| L-m.Sox2-5p           | aag                                                             | gca                                                            |                                                                |
| L-m.Sox2-5p           | cagctggtacacgcaaaagagaagcc <del>taaat</del> acagacatattacagaa   | tctctgtaatatgtctgt <del>at</del> ttaggcttctcttttgcgtgtaccagc   |                                                                |
| L-Klf4                | ga                                                              | tg                                                             |                                                                |
| L-Klf4                | AAAAGCTAGTTTCTAACCTTTCACACTGCTCTCC                              | AAAAAGCTTGGGAAGGTTCTTTTGTACTTAGA                               |                                                                |
| L-m.Klf4              | gtggttctaaggtaccacaaacgggg <del>tttaata</del> agttctccaactgctg  | tcaaaagtatgcagcagttggagaact <del>at</del> taaacccccgttggtagc   |                                                                |
| L-m.Klf4-5p           | catacttttga                                                     | tttagaacac                                                     |                                                                |
| L-m.Klf4-5p           | gaagccaaccttaccttagcaagaggat <del>taattat</del> actgtgctttttta  | actgagtagtctaaaaaagcaagt <del>ataatta</del> atcctcttgctaaggta  |                                                                |
| L-c-Myc               | gactactcagt                                                     | aggttggcttc                                                    |                                                                |
| L-m.c-Myc (Mut-01)    | AAAAGCTAGTACGAGAACAGTTGAAACACAAACTC                             | AAAAAGCTTGCCTAAGGATAAAGTGGTTTGA                                |                                                                |
| L-m.c-Myc (Mut-02)    | ctgggctttgggactgtaagct <del>acttaatt</del> aattttaactgcctcaa    | actattttaagtttgaggcagttaaaatta <del>at</del> taagtagcttacagtc  |                                                                |
| L-m.c-Myc (Mut-01)    | acttaaatagt                                                     | caaagccccag                                                    |                                                                |
| L-m.c-Myc (Mut-02)    | tccgctggttaggggtctgag <del>taaaaa</del> gctacaggctccataggag     | gctcctaattggagcctgtagc <del>ttttta</del> ctcagaaccctaaccagcgg  |                                                                |
| L-m.c-Myc-5p (Mut-01) | c                                                               | a                                                              |                                                                |
| L-m.c-Myc-5p (Mut-01) | gggtggagggtgtgtgtgtactcag <del>ttatta</del> atagctcactcctacc    | aagtggttaaggttaggtgagctat <del>taataa</del> ctgagtacacacaaca   |                                                                |
| L-m.c-Myc-5p (Mut-02) | ttaccactt                                                       | ccctccacc                                                      |                                                                |
| L-m.c-Myc-5p (Mut-02) | aaaaccagagctgttagttaggaatgggcaaa <del>taatt</del> agtgagaagg    | cctgcatctagcctctcact <del>aa</del> ttatttgccattcctaactaacag    |                                                                |
| L-Prmt7               | tagatgcagg                                                      | ctctggtttt                                                     |                                                                |
| L-Prmt7               | AAAAGCTAGTCAGACACCTTGAGCTGATCTCTT                               | AAAAAGCTTGGGTTAGGGTAAAATGTTGGAG                                |                                                                |
| L-m.Prmt7 (Mut-01)    | ctagaacaagacgcccagct <del>aaataa</del> ctctcacgggtttattttctcc   | aggagaaaaataaacctgtgagga <del>tttat</del> tagctcggcgtcttgttcta |                                                                |
| L-m.Prmt7 (Mut-02)    | t                                                               | g                                                              |                                                                |
| L-m.Prmt7-5p (Mut-01) | aaaacagtatcttctaaaat <del>aaataaa</del> agttaatacaatagttaaaaagc | gcttttttaactattgtattactt <del>ttat</del> tttatttagaaactgtttt   |                                                                |
| L-m.Prmt7-5p (Mut-01) | atctgcacagcatcaggtgtg <del>actaaat</del> gcataagctggcgagtgact   | cagtcactgcagcctatgc <del>at</del> ttatgacacctgatgctgtgcagat    |                                                                |
| L-m.Prmt7-5p (Mut-02) | agaggtgacctgtgataacag <del>taataa</del> agggcagtagacacctgacct   | cttaggcaaggtgactgacct <del>ttatta</del> ctgttatcacaaggtcacct   |                                                                |
| miR24-3P mimic        | UGGCUCAGUUCAGCAGGAACAG                                          | CUGUUCUGUGAUCAGAGCCA                                           |                                                                |
| miR24-2-5p mimic      | GUGCCUACUGAGCUGAAACAGU                                          | ACUGUUUCAGUCAGUAGGCAC                                          |                                                                |

**Supplementary Table S1. Continued.**

|                         |                                                                       | <b>5'-3' Forward Sequence</b>       | <b>5'-3' Reverse Sequence</b>       |
|-------------------------|-----------------------------------------------------------------------|-------------------------------------|-------------------------------------|
| <b>RT-PCR</b>           | mGAPDH                                                                | CATGGCCTTCCGTGTTCCCTA               | GCCTGCTTCACCACCTTCTT                |
|                         | m18s RNA                                                              | TAGAGGGACAAGTGGCGTTC                | CGCTGAGCCAGTCAGTGT                  |
|                         | mPRMT7                                                                | CAGGTAGCGTCTGCCTTTGT                | CAACTCAGGCCGTTTATTGATGA             |
|                         | mNanog                                                                | TCTTCCTGGTCCCCACAGTTT               | GCAAGAATAGTTCTCGGGATGAA             |
|                         | mSox2                                                                 | GCTCGCAGACCTACATGAAC                | GCCTCGGACTTGACCACAG                 |
|                         | mOct4                                                                 | AGAGGATCACCTTGGGGTACA               | CGAAGCCAGAGATGGTGGTC                |
|                         | mcMyc                                                                 | CACCATGCCCTCAACGTGAACCTTACC         | TTATGCACCAGAGTTTGAAGCTGTTCG         |
|                         | mKlf4                                                                 | GTGCCCCGACTAACCGTTG                 | GTGTTGAACTCCTCGGTCT                 |
|                         | Luciferase                                                            | TCCTCTGACACATAATTGCGC               | GCTATTCTGATTACACCCGAGG              |
|                         | miR-24-3p                                                             | TGGCTCAGTTCAGCAGGAACAG              | *PerfeCTa Universal PCR Primer      |
|                         | miR-24-2-5p                                                           | GTGCCTACTGAGCTGAAACAGT              | *PerfeCTa Universal PCR Primer      |
|                         | miR-185-5p                                                            | TGGAGAGAAAGGCAGTTCTTGA              | *PerfeCTa Universal PCR Primer      |
|                         | miR-186-5p                                                            | CAAAGAATTCTCCTTTTGGGCT              | *PerfeCTa Universal PCR Primer      |
|                         | miR-200c-5p                                                           | CGTCTTACCCAGCAGTGTTTGG              | *PerfeCTa Universal PCR Primer      |
|                         | miR-221-3p                                                            | AGCTACATTGTCTGCTGGGTTTC             | *PerfeCTa Universal PCR Primer      |
|                         | miR-221-5p                                                            | ACCTGGCATAACAATGTAGATTCTGT          | *PerfeCTa Universal PCR Primer      |
| miR-431-5p              | TGCTCTGCAGGCCGTCATGCA                                                 | *PerfeCTa Universal PCR Primer      |                                     |
| miR-466a-3p             | TATACATACACGCACACATAAGA                                               | *PerfeCTa Universal PCR Primer      |                                     |
| miR-466b-3p             | ATACATACACGCACACATAAGA                                                | *PerfeCTa Universal PCR Primer      |                                     |
| SNORD47                 | GTGATGATTCTGCCAAATGATACAAAGTGATATCACCTTTAAACCG<br>TTCCATTTTATTTCTGAGG | *PerfeCTa Universal PCR Primer      |                                     |
| SNORD66                 | GTCAGTGCCACGTGTCTGGGCCACTGAGACCACATGATGGGATTGA<br>GGACCTGAGGAA        | *PerfeCTa Universal PCR Primer      |                                     |
| <b>ChIP</b>             | miR-24-2                                                              |                                     |                                     |
|                         | a                                                                     | TGTCATGTAGGTTCTGGGAAAG              | GATCTCTGCACTTGGGAACA                |
|                         | b                                                                     | AAGAGCAGTAGCCACTCTTAA C             | GTGTAGGGAGTTTCCAGCCATC              |
|                         | c                                                                     | GGCCTAAAACCTCATCATGTAGC             | AGTTGGTGGCTCAGTTTATC                |
|                         | d                                                                     | TAGAGGAGGGCTAGGGTGTG                | GCTTGCTGCCTATCTTGAC                 |
|                         | e                                                                     | GGATGGGATTTGATGCCAGT                | CACAGTGGCTAAGTTCCG                  |
| f                       | CCACGATGCCATGAAGAAAC                                                  | GTACCTACCACCTGCTCAATTA              |                                     |
| <b>Promoter Cloning</b> | miR-24-2-0.5kb                                                        | AATGCTCGAGTGTGGTGAGGTGTACCTATAATCCT | CAATAAGCTTAGAGCCCTGCCAGCCAGGAGGCAGA |
|                         | miR-24-2-1.0kb                                                        | AATGCTCGAGGCATCGGCCTGCTTCTCCTTGCTTG | CAATAAGCTTAGAGCCCTGCCAGCCAGGAGGCAGA |
|                         | miR-24-2-1.5kb                                                        | AATGCTCGAGAGGACAACCTGCAAGGGTCCGTATG | CAATAAGCTTAGAGCCCTGCCAGCCAGGAGGCAGA |
|                         | miR-24-2-2.0kb                                                        | AATGCTCGAGGAAGCTGGAGTTACAGGTAGTTGTG | CAATAAGCTTAGAGCCCTGCCAGCCAGGAGGCAGA |

\* These RT-PCR primers were from Quanta Biosciences



## Supplementary Table S3

**Supplementary Table S3.** A list for miRNAs that are at least 2 fold up-regulated by PRMT7 knockdown and are predicted to target the 3' UTR of *Oct4*, *Nanog*, and/or *Sox2* by miRNA target prediction programs

| Mouse miRNA Name | shPRMT7-7 /shLuc | shPRMT7-8 /shLuc | Target                        | Predicted by the following programs                             |
|------------------|------------------|------------------|-------------------------------|-----------------------------------------------------------------|
| miR-24-3p        | 2.021            | 2.354            | <i>Oct4</i> ,<br><i>Nanog</i> | DIANAmT, miRanda, miRWalk, PICTAR5, TargetScan                  |
| miR-24-2-5p      | 3.927            | 3.637            | <i>Oct4</i> ,<br><i>Nanog</i> | DIANAmT, miRanda, miRWalk, PICTAR5, TargetScan                  |
| miR-466a-3p      | 3.353            | 3.004            | <i>Sox2</i>                   | miRanda, miRWalk, PICTAR5, TargetScan                           |
| miR-466b-3p      | 3.256            | 2.885            | <i>Sox2</i>                   | miRanda, miRWalk, PICTAR5, TargetScan                           |
| miR-542-3p       | 2.385            | 3.263            | <i>Oct4</i>                   | DIANAmT, miRanda, miRWalk, PICTAR5, TargetScan                  |
| miR-221-3p       | 4.033            | 2.409            | <i>Nanog</i>                  | DIANAmT, miRWalk, PICTAR5, PITA                                 |
| miR-221-5p       | 2.271            | 1.862            | <i>Nanog</i>                  | DIANAmT, miRWalk, PICTAR5, PITA                                 |
| miR-431-5p       | 2.228            | 2.470            | <i>Sox2</i>                   | DIANAmT, miRanda, miRWalk, PICTAR5, TargetScan                  |
| miR-186-5p       | 2.221            | 3.637            | <i>Oct4</i>                   | DIANAmT, miRanda, miRWalk, PICTAR5, TargetScan                  |
| miR-200c-5p      | 2.184            | 1.694            | <i>Sox2</i>                   | DIANAmT, miRanda, miRDB, miRWalk, RNAhybid, PICTAR5, TargetScan |



## Supplementary Table S5

**Supplementary Table S5.** Putative target sites of miR-24-3p and miR-24-2-5p in the 3'UTR of *Prmt7*.

| microRNA    | Position  | mir24-3p and miR-24-2-5p target sites in the 3'UTR regions of PRMT7                                  |
|-------------|-----------|------------------------------------------------------------------------------------------------------|
| miR-24-3p   | 885-906   | 5' GAACAAGACGCGGAGCUUGAGCCU (UTR)<br>                             <br>3' GACAAGGACGACUUGACUCGGU      |
|             | 1165-1186 | 5' AACAGUAUUUCUAAUCUGAGCAA (UTR)<br>                                   <br>3' GACAAGGACGACUUGACUCGGU |
| miR-24-2-5p | 117-138   | 5' CACAGCAUCAGGUGUGGCAGGCAG (UTR)<br>                             <br>3' UGACAAGUCGAGUCAUCCGUG       |
|             | 1579-1600 | 5' GUGACCUUGUGAUAACAGAGGCAC (UTR)<br>                             <br>3' UGACAAAGUCGAGUCAUCCGUG      |
